Running head: SHARED REPRESENTATIONS OF CONFLICT AND NEGATIVE AFFECT

1

2

3

4 **Shared Neural Representations of Cognitive Conflict and Negative Affect in the Dorsal**

5 **Anterior Cingulate Cortex**

6

7 Luc Vermeulen<sup>1\*</sup>, David Wisniewski<sup>1</sup>, Carlos González-García<sup>1</sup>, Vincent Hoofs<sup>1</sup>, Wim

8 Notebaert<sup>1</sup>, Senne Braem<sup>1,2</sup>

9

10 <sup>1</sup>Department of Experimental Psychology, Ghent University, Belgium

11 <sup>2</sup>Department of Experimental and Applied Psychology, Vrije Universiteit Brussel, Belgium

12

13 \*Correspondence

14 Luc Vermeulen

15 Department of Experimental Psychology

16 Henri Dunantlaan 2

17 B – 9000 Ghent

18 BELGIUM

19 **Email:** Luc.Vermeulen@ugent.be

## SHARED REPRESENTATIONS OF CONFLICT AND NEGATIVE AFFECT

### 20 **Abstract**

21 Influential theories of dorsal anterior cingulate cortex (dACC) function suggest that the dACC  
22 registers cognitive conflict as an aversive signal, but no study directly tested this idea. In this pre-  
23 registered human fMRI study, we used multivariate pattern analyses to identify which regions  
24 respond similarly to conflict and aversive signals. The results show that, of all conflict- and  
25 value-related regions, only the dACC/pre-SMA showed shared representations, directly  
26 supporting recent dACC theories.

### 27 **Main**

28 The dACC has been implicated in various psychological processes such as cognitive control,  
29 somatic pain, emotion regulation, reward learning and decision making<sup>1-3</sup>. In the domain of  
30 cognitive control, dACC is consistently activated by cognitive conflict, that is, the simultaneous  
31 activation of mutually incompatible stimulus, task, or response representations<sup>4</sup>. It has been  
32 proposed that dACC generates a domain-general aversive learning signal which biases behavior  
33 away from costly information processing (e.g., conflict)<sup>5-7</sup>. Recent behavioral studies indeed  
34 demonstrated that humans dislike and tend to avoid conflict, and automatically evaluate conflict  
35 as aversive<sup>8-10</sup>. Similarly, it has been proposed that conflict and negative affect are integrated in  
36 the dACC<sup>3,9,11</sup>. Given these proposals and findings, one would expect conflict and negative affect  
37 to be encoded similarly in dACC (“shared representations”).

38 One recent study tried to investigate this hypothesis using a repetition suppression procedure,  
39 and found that dACC showed an attenuated response to negative affect following cognitive  
40 conflict<sup>12</sup>. However, other studies failed to provide evidence for this idea. For example, a number  
41 of studies and meta-analyses demonstrated that distinct parts of the ACC are associated with

## SHARED REPRESENTATIONS OF CONFLICT AND NEGATIVE AFFECT

42 cognitive conflict and pain processing<sup>13–16</sup>. Similarly, a recent meta-analysis failed to observe  
43 overlap between cognitive control, pain processing, and (negative) emotion in the medial  
44 Prefrontal Cortex<sup>17</sup>. However, these previous studies often focus on peak activations across fMRI  
45 studies that differ in experimental control, or involve intense pain responses that could mask  
46 similarities with the arguably subtler affective evaluation of cognitive conflict.

47 Here, we took a different approach and developed a tightly controlled within-subjects test of  
48 shared neural representations of conflict and affect in the brain. Namely, by using multivariate  
49 cross-classification analyses, we assessed whether and where a classifier algorithm trained to  
50 discern conflict (incongruent vs congruent events) can successfully predict affect (negative vs  
51 positive events), and vice versa. Successful classification would indicate a similarity between the  
52 neural pattern response, and thus a shared representational code between these two domains<sup>18,19</sup>.

53 Specifically, 38 human subjects performed a color Stroop<sup>20</sup> and flanker task<sup>21</sup> in the conflict  
54 domain, and two closely matched tasks in the affective domain (Fig. 1A). Importantly, we used  
55 two tasks in each domain in order to demonstrate an abstract representation of conflict (and  
56 affect), that is independent of conflict type (and affect source)<sup>22</sup>. Conflict and affect-related brain  
57 signals were used to perform a leave-one-run-out cross-classification analysis using a linear  
58 Support Vector Machine (see Methods). We performed preregistered Region of Interest (ROI)  
59 and whole brain searchlight analyses (Supplementary Table 1), and report accuracy-minus-  
60 chance values for each ROI and searchlight sphere (ROIs: Amygdala, Anterior Cingulate Cortex  
61 [ACC], dACC/pre-SMA, Anterior Insula [AI], Posterior Cingulate Cortex [PCC], Ventral  
62 Striatum [VS], and the ventromedial Prefrontal Cortex [vmPFC]).

63

## SHARED REPRESENTATIONS OF CONFLICT AND NEGATIVE AFFECT

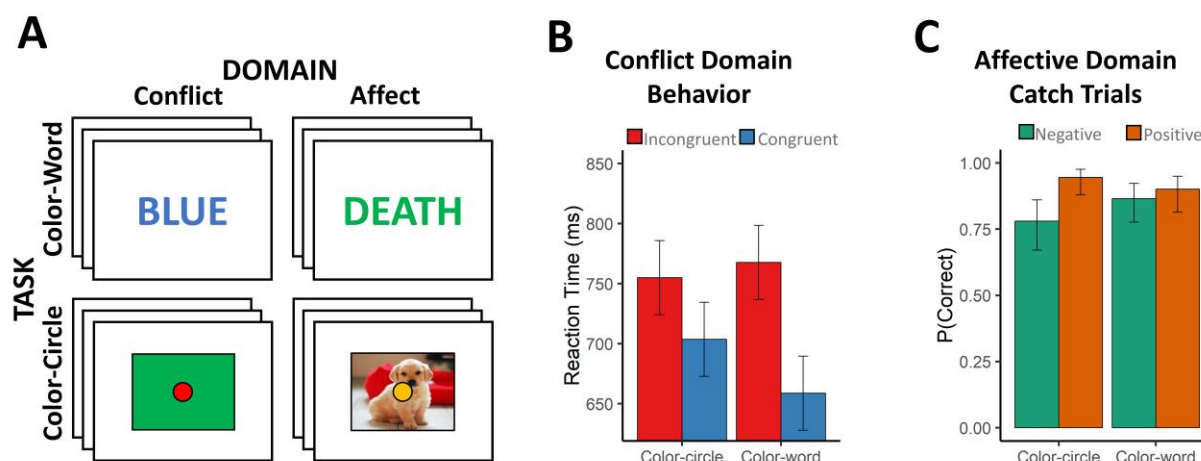

64

65 **Figure 1.** Task Design and Behavioral Data. **(A)** Task design. Subjects either judged the color of

66 words or the color of circles. In the conflict domain, the color either matched or mismatched with

67 word meaning or background color creating congruent or incongruent conditions, respectively.

68 In the affective domain, positive or negative words and pictures were used to create the

69 respective conditions. These four task contexts were presented block-wise. **(B)** In the conflict

70 domain, typical congruency effects were found ( $F_{(1,37)}=148.81, p<.001, BF>100$ ), which were

71 larger in the color-word task ( $F_{(1,37)}=35.55, p<.001, BF>100$ ). **(C)** On catch trials in the affective

72 domain, subjects had to make a valence judgement (positive or negative) on the affective

73 background stimuli.

74

75 The behavioral data (Fig. 1B and Supplementary Table 3) and univariate brain results

76 (Supplementary Table 2) from the conflict tasks showed the typical differences between

77 congruent and incongruent trials. In the affective tasks, catch trials (where subjects had to make a

78 valence judgement instead of a color judgement) and a post-experiment incidental memory test

79 were used to inform processing of the (task-irrelevant) affective stimuli (see Supplementary

## SHARED REPRESENTATIONS OF CONFLICT AND NEGATIVE AFFECT

80 Table 4 for behavioral results). We observed above-chance catch trial performance (chance level  
81 = 50%; see Fig. 1C and Methods) and successful post-experiment incidental recognition of the  
82 affective stimuli (Supplementary Figure 5), ensuring that subjects processed the affective  
83 pictures.

84 In a first set of multivariate pattern analyses, we trained and tested a classifier within-task (within  
85 the Stroop or flanker task; Fig. 2A, left panels; which regions respond to conflict within tasks?),  
86 as well as cross-task (train and test on different tasks; which regions respond similarly to conflict  
87 independent of low-level task features?), in each of our preregistered ROIs (for analysis details,  
88 see Method and Fig. 2B, left panels). Within-task ROI analyses in the conflict domain  
89 (congruent vs. incongruent) revealed evidence for above chance-level decoding in the dACC/pre-  
90 SMA (*Wilcoxon*  $V=327$ ,  $P=.009$ ,  $BF_{10}=8.48$ ), but not in any of the other regions (all  $P>.060$ ,  
91  $BF<0.60$ ) (Fig. 2A, right panel). This decoding accuracy in the dACC/pre-SMA did not differ by  
92 task ( $F_{(1,37)}=0.72$ ,  $P=.400$ ,  $BF=0.34$ ). Second, the results show for the first time a conflict  
93 representation independent of conflict task as within-conflict cross-task ROI analyses revealed  
94 above-chance level conflict decoding in the dACC/pre-SMA ( $V=283$ ,  $P=.012$ ,  $BF=5.57$ ). Again,  
95 decoding accuracy did not differ between cross-task combination (i.e., from flanker to Stroop or  
96 Stroop to flanker) ( $F_{(1,37)}=0.89$ ,  $P=.352$ ,  $BF=0.35$ ) (Fig. 2B, right panel). These results were also  
97 replicated in an overall decoding approach where the classifier was trained and tested in the  
98 whole domain regardless of task (resulting in more samples to train the classifier; Supplementary  
99 Fig. 1A). Within the affective domain (positive vs. negative), we also performed these within-  
100 and cross-task decoding analyses. However, while these analyses showed evidence for affect  
101 information in the insula, they did not show evidence for decoding in the dACC/pre-SMA  
102 (Supplementary Fig. 2).

## SHARED REPRESENTATIONS OF CONFLICT AND NEGATIVE AFFECT

103 Finally, we evaluated our main hypothesis by training a classifier on discerning conflict  
104 (incongruent vs congruent) and testing its performance on discerning affect (negative vs  
105 positive), and vice versa. For this analysis, we focussed on the cross-domain cross-task decoding  
106 (train and test in different domains on different tasks) as this analysis also controls for more low-  
107 level shared features between the two tasks (Fig. 2C, right panel). The cross-domain cross-task  
108 ROI decoding revealed evidence for cross-classification in the dACC/pre-SMA ( $V=330$ ,  $P=.007$ ,  
109  $BF=8.43$ ; Fig. 2C, right panel), which did not differ by cross-task combination ( $F_{(1,37)}=0.36$ ,  
110  $P=.551$ ,  $BF=0.29$ ). None of the other ROIs reached significance (all  $P_s>.101$ ). These results  
111 were replicated with the overall decoding approach in the main dACC/pre-SMA ROI ( $V=449$ ,  
112  $P=.021$ ,  $BF=4.65$ ; Supplementary Fig. 1C).

113

## SHARED REPRESENTATIONS OF CONFLICT AND NEGATIVE AFFECT

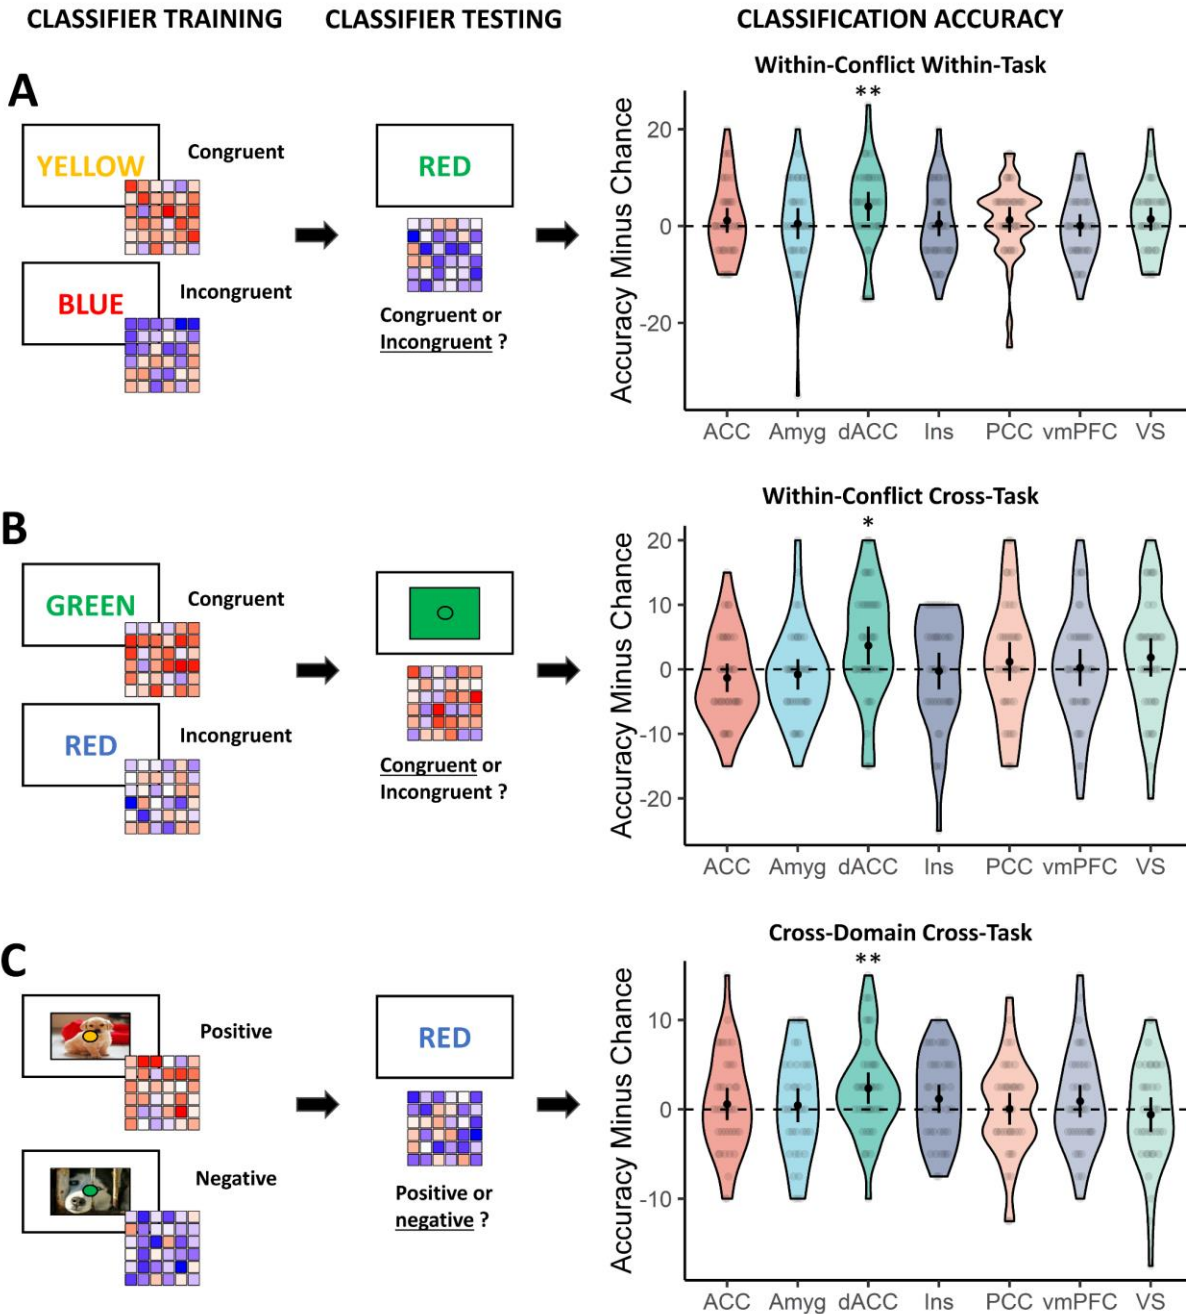

114

115 **Figure 2.** Main Results. (A) Training and testing the classifier within the conflict domain, within  
116 the same task. (B) Training the classifier on one conflict task and testing its performance on  
117 another conflict task. (C) Training the classifier to discern affect and testing its performance on  
118 classifying conflict across-tasks (and vice versa). \* $P < .05$ ; \*\* $P < .01$ ; black dots and error bars

## SHARED REPRESENTATIONS OF CONFLICT AND NEGATIVE AFFECT

119 represent mean and  $\pm 95$  CI respectively; transparent dots represent individual data points; the  
120 shape of the violin shows the distribution of the data.

121

122 A number of control analyses further confirmed our main finding. First, we replicated this result  
123 using different smoothing parameters (Supplementary Fig. 3), or when using spherical ROIs  
124 instead of the Harvard-Oxford atlas ROIs (Supplementary Fig. 4). Second, also when using a set  
125 of functionally (rather than anatomically) defined conflict-sensitive ROIs based on a recent meta-  
126 analysis<sup>23</sup> (Supplementary Fig. 1, panel D), we again observed evidence for cross-domain cross-  
127 task classification in the dACC/pre-SMA ( $V=450$ ,  $P=.013$ ,  $BF=3.75$ ) but not for other conflict-  
128 sensitive ROIs (left MOG, right AI, left AI, left IFG, left IPL, right IPL, left MFG), except for  
129 the left AI ( $V=425$ ,  $P=.005$ ,  $BF=8.61$ ). The result again replicated when using the overall  
130 decoding approach in the dACC/pre-SMA ( $V=449$ ,  $p=.001$ ,  $BF=41.06$ ), but not in the left AI  
131 ( $V=335$ ,  $P=.260$ ,  $BF=0.34$ ).

132 Together, our results are the first to show that the dACC/pre-SMA shows a similar voxel pattern  
133 response to conflict and negative affect, and thereby offer important support for the popular  
134 proposal that the dACC registers conflict as an aversive signal<sup>3,5,6</sup>, thought to bias behavior away  
135 from costly, demanding or suboptimal outcomes (as evidenced by behavioral avoidance and  
136 negative evaluation of conflict<sup>8,9</sup>).

137 Moreover, our study is also the first to show decoding of conflict across conflict tasks in the  
138 dACC, suggesting a shared component in the detection of conflict across the Stroop and flanker  
139 task<sup>22</sup>. The fact that we did not observe a similar (significant) above-chance decoding of affect in  
140 the dACC, but did observe cross-domain decoding, might seem surprising. However, this most



## SHARED REPRESENTATIONS OF CONFLICT AND NEGATIVE AFFECT

141 likely suggests differences in signal to noise ratio (SNR) between the two domains and does not  
142 invalidate the cross-domain decoding result<sup>24</sup>. A lower SNR in the affect domain can be  
143 explained by the fact that affect was not relevant for the main task.

144 The present findings also contradict the idea that cognitive control and affect are processed in  
145 distinct subdivisions of the ACC (e.g., dorsal-cognitive vs. ventral-emotional<sup>14</sup>). While the  
146 integration of cognitive control and affect in the dACC gained traction over the last two  
147 decades<sup>3,25</sup>, direct evidence for this idea was lacking, and recent (meta-analytical) studies were  
148 more in line with the idea that both are processed in different subregions<sup>13,17</sup>. These studies were  
149 problematic for many theories of dACC functioning as these theories often hold the (implicit)  
150 assumption that dACC's response to suboptimal outcomes (e.g., conflict) has an evaluative  
151 component (e.g., signaling avoidance learning<sup>3,5</sup>, expected value of control<sup>6,7</sup>, value of the non-  
152 default option<sup>26</sup>, evaluating action-outcome expectancies<sup>27</sup>). By using a tightly controlled within-  
153 subject design and multivariate analysis techniques, we now show that conflict and negative  
154 affect are indeed integrated in the dACC/pre-SMA, thereby providing important support for a  
155 more integrative view and current theories of dACC functioning.

### 156 **Acknowledgements**

157 We would like to thank Tobias Egner for valuable comments on a previous draft of the  
158 manuscript. W.N., S.B. (G.0660.17N) and L.V. (11H5619N) were supported by the FWO –  
159 Research Foundation Flanders. C.G.G. was supported by the Special Research Fund of Ghent  
160 University (BOF.GOA.2017.0002.03). D.W. was supported by the FWO  
161 (FWO.KAN.2019.0023.01), and the European Union's Horizon 2020 research and innovation  
162 program under the Marie Skłodowska-Curie grant agreement No 665501. All procedures applied

## SHARED REPRESENTATIONS OF CONFLICT AND NEGATIVE AFFECT

163 in the present experiment were carried out with adequate understanding and written consent of  
164 the subjects and are in accordance with the Declaration of Helsinki.

### 165 **Author Contributions**

166 S.B. and W.N. developed the study concept. S.B., W.N. and L.V. contributed to the study design.  
167 Data collection was performed by L.V. and V.H.. Data analysis was performed by L.V. under the  
168 supervision of S.B., D.W. and C.G.C.. The manuscript was drafted by L.V. in cooperation with  
169 S.B., W.N., D.W. and C.G.C.. All authors approved the final version of the manuscript for  
170 submission.

### 171 **Competing Interests**

172 The authors have no competing interests to declare.

### 173 **References**

- 174 1. Ebitz, R. B. & Hayden, B. Y. *Nat. Neurosci.* **19**, 1278 (2016).
- 175 2. Heilbronner, S. R. & Hayden, B. Y. *Annu. Rev. Neurosci.* **39**, 149–170 (2016).
- 176 3. Shackman, A. J. *et al. Nat. Rev. Neurosci.* **12**, 154–167 (2011).
- 177 4. Botvinick, M. M. *et al. Psychol. Rev.* **108**, 624–652 (2001).
- 178 5. Botvinick, M. M. *Cogn. Affect. Behav. Neurosci.* **7**, 356–366 (2007).
- 179 6. Shenhav, A., Botvinick, M. M. & Cohen, J. D. *Neuron* **79**, 217–240 (2013).
- 180 7. Shenhav, A., Cohen, J. D. & Botvinick, M. M. *Nat. Neurosci.* **19**, 1286 (2016).
- 181 8. Dreisbach, G. & Fischer, R. **24**, 255–260 (2015).
- 182 9. Inzlicht, M., Bartholow, B. D. & Hirsh, J. B. *Trends Cogn. Sci.* **19**, 126–132 (2015).
- 183 10. Dignath, D., Eder, A. B., Steinhauser, M. & Kiesel, A. *Psychon Bull Rev.* In press.
- 184 11. Lieberman, M. D. & Eisenberger, N. I. *Proc. Natl. Acad. Sci.* **112**, 15250–15255 (2015).

SHARED REPRESENTATIONS OF CONFLICT AND NEGATIVE AFFECT

- 185 12. Braem, S. *et al.* *J. Cogn. Neurosci.* **29**, 137–149 (2017).
- 186 13. Jahn, A., Nee, D. E., Alexander, W. H. & Brown, J. W. *J. Neurosci.* **36**, 12385–12392  
187 (2016).
- 188 14. Bush, G., Luu, P. & Posner, M. I. *Trends Cogn. Sci.* **4**, 215–222 (2000).
- 189 15. Lieberman, M. D., Burns, S. M., Torre, J. B. & Eisenberger, N. I. *Proc. Natl. Acad. Sci.* **113**,  
190 E2476–E2479 (2016).
- 191 16. De La Vega, A., Chang, L. J., Banich, M. T., Wager, T. D. & Yarkoni, T. *J. Neurosci.* **36**,  
192 6553–6562 (2016).
- 193 17. Kragel, P. A. *et al.* *Nat. Neurosci.* **21**, 283 (2018).
- 194 18. Kaplan, J. T., Man, K. & Greening, S. G. *Front. Hum. Neurosci.* **9**, 151 (2015).
- 195 19. Wisniewski, D. *Front. Psychol.* **9**, (2018).
- 196 20. Stroop, J. R. *J. Exp. Psychol.* **18**, 643 (1935).
- 197 21. Eriksen, B. A. & Eriksen, C. W. *Percept. Psychophys.* **16**, 143–149 (1974).
- 198 22. Jiang, J. & Eger, T. *Cereb. Cortex* **24**, 1793–1805 (2013).
- 199 23. Chen, T. *et al.* *A Brain Struct. Funct.* **223**, 3813–3840 (2018).
- 200 24. van den Hurk, J. & de Beeck, H. P. O. *bioRxiv* 592410 (2019).
- 201 25. Okon-Singer, H., Hendler, T., Pessoa, L. & Shackman, A. J. *Front. Hum. Neurosci.* **9**, 58  
202 (2015).
- 203 26. Calhoun, A. J. & Hayden, B. Y. *Curr. Opin. Behav. Sci.* **5**, 24–31 (2015).
- 204 27. Brown, J. W. & Alexander, W. H. *J. Cogn. Neurosci.* **29**, 1656–1673 (2017).

205

206

207

208

## SHARED REPRESENTATIONS OF CONFLICT AND NEGATIVE AFFECT

### 209 **Methods**

#### 210 *Participants*

211 The study was pre-registered with the pre-registration template from AsPredicted.org on the  
212 Open Science Framework (<https://osf.io/p5frq/>). As pre-registered, 40 participants participated in  
213 our study. Two participants were excluded (one due to excessive head motion [ $>2.5$ mm  
214 translation] and one aborted the scanning session). The average age of the remaining 38  
215 participants (13 male) was 23.71 years ( $SD=3.53$ , min=18, max=33). Thirty-six participants  
216 were right-handed, one was left-handed and one was ambidextrous (as assessed by the Edinburgh  
217 Handedness Inventory<sup>28</sup>). Every participant had normal or corrected to normal vision and  
218 reported no current or history of neurological, psychiatric or major medical disorder. Every  
219 participant gave their informed written consent before the experiment, and was paid 35 euros for  
220 participating afterwards. The study was approved by the local ethics committee (University  
221 Hospital Ghent University, Belgium).

#### 222 *Experimental Paradigm*

223 The experiment was implemented using Psychopy 2 version 1.85.2<sup>29</sup>. On each trial, participants  
224 had to judge the color of a target stimulus in the center of the screen, using two MR-compatible  
225 response boxes (each box had two buttons) to indicate one out of four possible response options  
226 (red, blue, green and yellow). The key-to-color mapping was counterbalanced between  
227 participants. The exact features of the target stimulus varied block-wise, depending on one of  
228 four different task-contexts. Specifically, participants either had to respond to the color of words  
229 (“color-word naming task”) or respond to the color of circles (“color-circle naming task”), which  
230 both had a conflict and affective version.

## SHARED REPRESENTATIONS OF CONFLICT AND NEGATIVE AFFECT

231 The conflict-version of the color-word naming task was a Stroop task<sup>20</sup>, where the meaning of  
232 the words could either be congruent or incongruent with the actual color of the word. For  
233 example, participants could see the words “BLUE”, “RED”, “GREEN” or “YELLOW” (Dutch:  
234 “ROOD”, “BLAUW”, “GROEN” or “GEEL”) presented in a blue, red, green or yellow font. The  
235 conflict version of the color-circle naming task was essentially a color-based variant on the  
236 Eriksen flanker task<sup>21</sup>, where the irrelevant feature consisted of a colored background square  
237 which could either be congruent or incongruent with the color of the circle. Here, participants  
238 could see blue, red, green or yellow circles presented on a blue, red, green or yellow background  
239 square. In both tasks, half of the trials were congruent (e.g., “RED” in a red font; a red circle  
240 presented on a red square background) while the other half of the trials were incongruent (e.g.,  
241 “RED” in a blue font; a red circle on a blue square background).

242 The affect-versions of the color-word naming and color-circle naming tasks made use of  
243 irrelevant affective words or pictures, respectively. In the color-word naming task, 16 positive  
244 and 16 negative words were presented<sup>30</sup> that were matched on arousal, power, age of acquisition,  
245 Dutch word frequency<sup>31</sup>, word length and grammatical category (Noun, Adjective and Verbs).  
246 The affective picture distractors in the background of the color-circle naming task were retrieved  
247 from the OASIS database<sup>32</sup>. Sixteen positive and 16 negative pictures were presented that were  
248 matched on semantic category (Animals, Objects, People, Scenery) and arousal. This resulted in  
249 a total of eight conditions: congruent, incongruent, positive or negative trials, that either involved  
250 words or pictures/colored backgrounds. While our stimuli were matched on arousal, we also  
251 performed a control analysis where we trained a classifier to distinguish low versus high  
252 arousing stimuli (matched on valence) and tested its performance on distinguishing congruent  
253 versus incongruent stimuli (and vice versa). In contrast to our affect decoding results, this cross-

## SHARED REPRESENTATIONS OF CONFLICT AND NEGATIVE AFFECT

254 domain cross-task decoding was not significant in the dACC/pre-SMA ( $V=294$ ,  $P=403$ ,  
255  $BF10=0.26$ ).

256 Each trial started with a fixation sign (“+”) that was presented for 3 to 6.5 seconds (in steps of  
257 0.5 s;  $M=3.5$  s; drawn from an exponential distribution). Next, the target stimulus was presented  
258 for 1.5 seconds (fixed presentation time regardless of RT). In order to increase the saliency of the  
259 irrelevant dimension (conflict and affect), the onset of the affective word or picture preceded the  
260 presentation of the target feature by 200 ms during which the color of the target feature (word or  
261 circle) was white.

262 Participants performed five scanning runs and during each run the subjects performed each of the  
263 four task contexts in separate blocks. The order of the four blocked task contexts was fixed  
264 within participant but counterbalanced between participants. Each block hosted 32 trials (16  
265 congruent/positive and 16 incongruent/negative) which were presented in a pseudo-random  
266 fashion with the following restriction: neither relevant nor irrelevant features of the target  
267 stimulus could be repeated. This restriction was used to investigate confound-free congruency  
268 sequence effects (see <sup>33</sup>; but this was not the aim of the current study and will not be discussed  
269 further). In total, each participant made 640 trials (i.e., five runs of four blocks of 32 trials).

270 In each task context (block), we also included one catch trial (at random, but not in the first two  
271 or last two trials of each block). In these catch trials, the presentation of the task-irrelevant word,  
272 picture, or colored square would not be followed by the presentation of the target color, and  
273 remain on screen for three seconds. Participants were instructed that during these catch trials,  
274 when no color information was present in the relevant dimension, their goal was to judge the  
275 irrelevant dimension depending on the cognitive domain. In the conflict domain, participants had  
276 to respond to the meaning of the word (“RED”, “BLUE”, “GREEN” or “YELLOW”) or to the

## SHARED REPRESENTATIONS OF CONFLICT AND NEGATIVE AFFECT

277 color of the background square (red, blue, green or yellow) by using the respective key that  
278 would be used to judge the relevant dimension. In the affective domain, participants had to judge  
279 the affective word or background picture as either positive or negative by pressing all keys once  
280 or twice (response mapping for positive and negative stimuli counterbalanced between  
281 participants). The purpose of these catch trials was to increase the saliency of the irrelevant  
282 dimension.

283 Before the scanning session, participants were welcomed and instructed to read the informed  
284 consent after which they started practicing the experimental paradigm. After the scanning  
285 sessions, participants performed an unannounced recognition memory test on old and new  
286 affective words and pictures. Here, participants had to indicate whether they had previously seen  
287 the word or picture in the experiment (old/new judgement). The new words were matched with  
288 the old words in terms of valence, arousal, power, age of acquisition, word length, frequency,  
289 grammatical category. The new pictures were matched on valence, arousal and semantic  
290 category. In both a behavioral ( $n = 20$ ) and fMRI pilot ( $n = 20$ ), we already established that  
291 participants showed adequate performance on both the main task and the recognition memory  
292 task. Finally, participants completed four questionnaires (Need for Cognition, Behavioral  
293 Inhibition/Activation Scale, Positive and Negative Affect Schedule, Barret Impulsivity Scale)  
294 and were thanked for their participation. No significant correlations between these questionnaire  
295 scales and cross-classification accuracies were found, so we do not report these results.

### 296 *Behavioral Data Analysis*

297 Behavioral analyses were performed in R (RStudio version 1.1.463, [www.rstudio.com](http://www.rstudio.com)). For the  
298 reaction time (RT) analyses, we removed incorrect, premature ( $< 150$  ms), and extreme  
299 responses (RTs outside 3 SD from each condition mean for each participant). This resulted in an

## SHARED REPRESENTATIONS OF CONFLICT AND NEGATIVE AFFECT

300 average of 94.42 % of the trials left for the RT analyses ( $SD=3.18$ ,  $min=84.22$ ,  $max=98.28$ ). We  
301 conducted a repeated measures ANOVA on the reaction time and accuracy measure with the  
302 within-subject factors Condition (conflict domain: congruent vs. incongruent, affective domain:  
303 positive vs. negative) and Task (color-word naming vs. color-circle naming). We also assessed  
304 post-scanning recognition memory of affective stimuli with a probit generalized linear mixed  
305 effects model on the probability to say that the stimulus was ‘old’ with fixed effects for  
306 Experience (old vs. new), Valence (positive vs. negative) and Task Type (word vs. picture) and  
307 crossed random effects for Participant and Item. We also pre-registered some exclusion criteria  
308 based on behavioral performance. Participants with a mean RT outside 3 SD from the sample  
309 mean or a hit rate below 3 SD or 60 % (chance level=25 %) from the sample mean were  
310 excluded. Participants that performed poorly on the post-scanning recognition memory test, i.e.,  
311 hit rate or false alarm rate outside 3 SD of the sample mean were also excluded. In the end, no  
312 exclusions based on task performance had to be made. While performance on catch trials was not  
313 a pre-registered exclusion criterion, we found that two participants responded on chance level in  
314 the catch trials of the affective domain (chance level=50 %, positive vs. negative judgement).  
315 Excluding these participants did not change our conclusions.

### 316 *fMRI data acquisition*

317 fMRI data was collected using a 3T Magnetom Trio MRI scanner system (Siemens Medical  
318 Systems, Erlangen, Germany), with a sixty-four-channel radio-frequency head coil. A 3D high-  
319 resolution anatomical image of the whole brain was acquired for co-registration and  
320 normalization of the functional images, using a T1-weighted MPRAGE sequence ( $TR=2250$  ms,  
321  $TE=4.18$  ms,  $TI=900$  ms, acquisition matrix= $256 \times 256$ ,  $FOV=256$  mm, flip angle= $9^\circ$ , voxel  
322 size= $1 \times 1 \times 1$  mm). Furthermore, a field map was acquired for each participant, in order to



## SHARED REPRESENTATIONS OF CONFLICT AND NEGATIVE AFFECT

323 correct for magnetic field inhomogeneities (TR=520 ms, TE1=4.92 ms, TE2=7.38 ms, image  
324 matrix=70 x 70, FOV=210 mm, flip angle=60°, slice thickness=3 mm, voxel size=3 x 3 x 2.5  
325 mm, distance factor=0%, 50 slices). Whole brain functional images were collected using a T2\*-  
326 weighted EPI sequence (TR=1730 ms, TE=30 ms, image matrix=84 × 84, FOV=210 mm, flip  
327 angle=66°, slice thickness=2.5 mm, voxel size=2.5 x 2.5 x 2.5 mm, distance factor=0%, 50  
328 slices) with slice acceleration factor 2 (Simultaneous Multi-Slice acquisition). Slices were  
329 orientated along the AC-PC line for each subject.

### 330 *fMRI data analysis*

331 fMRI data analysis was performed using Matlab (version R2016b 9.1.0, MathWorks) and  
332 SPM12 ([www.fil.ion.ucl.ac.uk/spm/software/spm12/](http://www.fil.ion.ucl.ac.uk/spm/software/spm12/)). Raw data was imported according to  
333 BIDS standards (<http://bids.neuroimaging.io/>) and functional data was subsequently realigned,  
334 slice-time corrected, normalized (resampled voxel size 2 mm<sup>3</sup>) and smoothed (full-width at half  
335 maximum of 8 mm). The preprocessed data was then entered into a first-level general linear  
336 model analysis (GLM), and subsequently into a multivariate pattern analysis (MVPA<sup>34-37</sup>).  
337 Results were analyzed using a mass-univariate approach. Although we pre-registered that we  
338 would not normalize and smooth the data for our classification analyses, we found that Signal-to-  
339 Noise Ratio (SNR) was significantly improved with these additional preprocessing steps  
340 (Supplementary Fig. 3A). In addition, an independent classification analysis (classifying left vs.  
341 right responses in primary motor cortex) showed that decoding accuracies were significantly  
342 higher with these additional preprocessing steps (Supplementary Fig. 3B). Knowing that  
343 decoding information in the PFC is notoriously difficult as decoding accuracies are close to  
344 chance (relative to decoding in occipitotemporal cortex<sup>38</sup>), and the finding that smoothing can  
345 and does often improve SNR and decoding performance<sup>39-41</sup>, we decided to optimize our MVPA

## SHARED REPRESENTATIONS OF CONFLICT AND NEGATIVE AFFECT

346 analyses by decoding on normalized and smoothed data. For completeness, however, we also  
347 depict the results from our main cross-classification analysis for different levels of smoothing  
348 (FWHM 0, 4 and 8 mm; see Supplementary Fig. 3C).

349 First-level GLM analyses consisted of 5 identically modeled sessions (i.e., the five runs). Each  
350 session consists of eight regressors of interest (for the eight conditions, see above), four block  
351 regressors (to account for the blocked presentation of each combination of word versus picture  
352 versions of the conflict versus affect tasks), two nuisance regressors (that model performance  
353 errors and catch trials) and six movement regressors. The regressors were convolved with the  
354 canonical HRF. The modeled duration of the regressors of interest (the eight conditions) and  
355 nuisance regressors (errors, catch trials) was zero, while the modeled duration of the block  
356 regressors was equal to the length of the blocks.

357 Next, the beta images from the first-level GLM were submitted to leave-one-run-out decoding  
358 scheme with ‘The Decoding Toolbox’<sup>42</sup> using a linear support-vector classification algorithm  
359 ( $C=1$ ). We performed whole-brain searchlight decoding (sphere radius: 3 voxels; Supplementary  
360 Table 1) as well as ROI decoding (see below for ROI methods). Cross-validation decoding was  
361 conducted within the affective (positive vs. negative) and conflict (congruent vs. incongruent)  
362 domain for each task separately (“within-domain within-task classification”). To assess the  
363 generalizability of the classifier within the domain, we also conducted cross-classification  
364 analyses where we trained the classifier on one task and tested its performance on the other task  
365 for each task type combination (from color-circle naming to color-word naming and vice versa)  
366 separately (“within-domain cross-task classification”). To investigate the generalizability of  
367 these classifiers across the domain (our main hypothesis), we trained the classifier in the conflict  
368 domain and tested its performance in the affective domain, and vice versa. We conducted these

## SHARED REPRESENTATIONS OF CONFLICT AND NEGATIVE AFFECT

369 analyses cross task type combinations (i.e., from color-circle naming to color-word naming, or  
370 from color-word naming to color-circle naming) to further control for low-level task features,  
371 following the same reasoning as the within-domain cross-task classification analyses. The results  
372 from these classification analyses were then averaged to return the cross-domain cross-task  
373 decoding results. For each of these three decoding analyses, we also ran ANOVAs to evaluate  
374 whether the result differed depending on the task (e.g., color-circle naming versus color-word  
375 naming) or task-to-task direction (i.e., from color-circle naming to color-word naming, or from  
376 color-word naming to color-circle naming). Finally, we also report an “overall decoding”  
377 analysis, where the classifier was trained across the two task types at once, thereby ignoring  
378 whether the event featured words or pictures/colored backgrounds.

379 Each classification analysis resulted in ‘accuracy-minus-chance’ decoding maps for each subject.  
380 These maps were then entered into a group second-level GLM analysis in SPM12. Here, a one-  
381 sample t-test determined which voxels show significant accuracy above chance level.

382 Next to MVPA, we also conducted classic univariate analyses. Here, we constructed a set of  
383 contrasts subtracting (A) positive from negative conditions and (B) congruent from incongruent  
384 conditions for (1) each task separately as well as across both tasks. These contrast images were  
385 then entered into a second-level analysis in which a one-sample t-test determined which voxels  
386 show significant activation for each contrast. We applied a statistical threshold of  $p < 0.001$   
387 (uncorrected) at the voxel level, and  $p < 0.05$  (family-wise error corrected) at the cluster level on  
388 all analyses (Supplementary Table 2).

389 *ROI analyses*

## SHARED REPRESENTATIONS OF CONFLICT AND NEGATIVE AFFECT

390 As part of our pre-registered main analysis plan, we conducted ROI decoding analyses. We set  
391 out to study the Amygdala, Anterior Cingulate Cortex (ACC), dorsal Anterior Cingulate  
392 Cortex/pre-SMA (dACC/pre-SMA), Anterior Insula (AI), Parietal Cingulate Cortex (PCC),  
393 Ventral Striatum (VS), and the ventromedial PFC (vmPFC). All ROIs were obtained from the  
394 Harvard-Oxford cortical and subcortical structural atlases, thresholded at 25%. As the dACC  
395 ROI was not defined in the Harvard-Oxford atlas, we decided to retrieve this ROI from  
396 Neurosynth<sup>43</sup> by entering “dacc” as search term (returning 162 studies reporting 4547  
397 activations). Although this ROI was based on the “dacc” search term, the peak effect of studies  
398 reporting dACC activity actually lies more dorsally than the cingulate gyrus, overlapping with  
399 the pre-SMA<sup>11\*</sup>. Therefore, we refer to this ROI as the dACC/pre-SMA. Next, we built a 10 mm  
400 sphere around the peak activation point in this activation map (association map). Because the  
401 dACC ROI was spherical (in contrast to the other six atlas ROIs), we also re-analyzed our results  
402 from the atlas ROIs with 10 mm spherical alternatives retrieved from Neurosynth, which  
403 returned highly similar results and did not change our statistical conclusions.

404 In addition to the pre-registered ROI analyses which were based on anatomically determined  
405 ROIs, we also ran a second set of ROI analyses with functionally informed ROIs. Namely, we  
406 created 10 mm sphere ROIs for all conflict-sensitive regions based on the most recent and  
407 inclusive meta-analysis we could find on cognitive conflict<sup>23</sup>.

408 Each ROI decoding analysis returned one accuracy-minus-chance value per ROI and participant.  
409 We tested whether these values were significantly higher than zero (one-tailed) with the non-  
410 parametric Wilcoxon signed-rank test and a Bayesian t-test (using the default priors from the  
411 BayesFactor package in R; Cauchy prior width:  $r=.707$ ). We report the Bayes Factor (BF) that  
412 quantifies the evidence for the alternative hypothesis (i.e., decoding accuracy is higher than

## SHARED REPRESENTATIONS OF CONFLICT AND NEGATIVE AFFECT

413 zero). Our pre-registered stopping criterion was if the main finding was  $BF > 6$  (i.e., or if we had  
414 reached 40 subjects, for financial reasons), but we would like to note that, if so, this result was  
415 typically also  $p < .00714$ , which is the Bonferroni-corrected alpha for the main set of 7 ROIs.  
416 Finally, we investigated whether the significant cross-task cross-domain classification accuracy  
417 correlated with the following behavioral indices: post-scanning affective recognition memory (d-  
418 prime), congruency sequence effects in reaction time and error rate and congruency sequence  
419 effects in reaction time and error rates (p-values of reported correlations are Holm-corrected for  
420 five tests) (see Supplementary Figure 5).

### 421 **Data Availability**

422 The minimal data necessary to replicate the reported findings can be found on the Open Science  
423 Framework (<https://osf.io/p5frq/>). Raw fMRI data and preprocessing scripts will be uploaded to a  
424 repository in the near future.

### 425 **Code Availability**

426 The custom code used for the analyses of this study can be found on the Open Science  
427 Framework (<https://osf.io/p5frq/>).

### 428 **References**

- 429 28. Oldfield, R. C. *Neuropsychologia* **9**, 97–113 (1971).  
430 29. Peirce, J. W. *J. Neurosci. Methods* **162**, 8–13 (2007).  
431 30. Moors, A. *et al. Behav. Res. Methods* **45**, 169–177 (2013).  
432 31. Keuleers, E., Brysbaert, M. & New, B. *Behav. Res. Methods* **42**, 643–650 (2010).  
433 32. Kurdi, B., Lozano, S. & Banaji, M. R. *Behav. Res. Methods* **49**, 457–470 (2017).  
434 33. Braem, S. *et al. Trends Cogn. Sci.* **23**, 769–783 (2019).

SHARED REPRESENTATIONS OF CONFLICT AND NEGATIVE AFFECT

- 435 34. Cox, D. D. & Savoy, R. L. *NeuroImage* **19**, 261–270 (2003).
- 436 35. Kriegeskorte, N., Goebel, R. & Bandettini, P. *Proc. Natl. Acad. Sci.* **103**, 3863–3868 (2006).
- 437 36. Haxby, J. V. *NeuroImage* **62**, 852–855 (2012).
- 438 37. Haynes, J.-D. *Neuron* **87**, 257–270 (2015).
- 439 38. Bhandari, A., Gagne, C. & Badre, D. *J. Cogn. Neurosci.* **30**, 1473–1498 (2018).
- 440 39. Kamitani, Y. & Sawahata, Y. *NeuroImage* **49**, 1949–1952 (2010).
- 441 40. Hendriks, M. H. A., Daniels, N., Pegado, F. & Op de Beeck, H. P. *Front. Neurol.* **8**, (2017).
- 442 41. Op de Beeck, H. P. *NeuroImage* **49**, 1943–1948 (2010).
- 443 42. Hebart, M. N., Görden, K. & Haynes, J.-D. *Front. Neuroinformatics* **8**, (2015).
- 444 43. Yarkoni, T., Poldrack, R. A., Nichols, T. E., Essen, D. C. V. & Wager, T. D. *Nat. Methods* **8**,
- 445 665–670 (2011).
- 446
